# Supplementary material
Source: publisher figshare collection journal article supplement (https://frontiersin.figshare.com/ndownloader/files/26148878)
Supplement: Supplementary file 1 [file 26148878]

# PERMANOVA

## Permutational MANOVA

### *Resemblance worksheet*

Name: Reseml  
Data type: Similarity  
Selection: All  
Transform: Square root  
Resemblance: S17 Bray Curtis similarity

Sums of squares type: Type III (partial)  
Fixed effects sum to zero for mixed terms  
Permutation method: Unrestricted permutation of raw data  
Number of permutations: 9999

### *Factors*

| Name    | Abbrev. | Type  | Levels |
|---------|---------|-------|--------|
| Species | Sp      | Fixed | 22     |

### *PERMANOVA table of results*

| Source | df  | SS     | MS     | Pseudo-F | P(perm) | Unique perms | P(MC)  |
|--------|-----|--------|--------|----------|---------|--------------|--------|
| Sp     | 21  | 1711,1 | 81,482 | 7,3274   | 0,0001  | 9909         | 0,0001 |
| Res    | 152 | 1690,3 | 11,12  |          |         |              |        |
| Total  | 173 | 3401,4 |        |          |         |              |        |

### *Details of the expected mean squares (EMS) for the model*

| Source | EMS                                                 |
|--------|-----------------------------------------------------|
| Sp     | $1 \cdot V(\text{Res}) + 7,3481 \cdot S(\text{Sp})$ |
| Res    | $1 \cdot V(\text{Res})$                             |

### *Construction of Pseudo-F ratio(s) from mean squares*

| Source | Numerator           | Denominator          | Num.df | Den.df |
|--------|---------------------|----------------------|--------|--------|
| Sp     | $1 \cdot \text{Sp}$ | $1 \cdot \text{Res}$ | 21     | 152    |

### *Estimates of components of variation*

| Source | Estimate | Sq.root |
|--------|----------|---------|
| S(Sp)  | 9,5755   | 3,0944  |
| V(Res) | 11,12    | 3,3347  |

# PERMANOVA

## Permutational MANOVA

### Resemblance worksheet

Name: Reseml  
 Data type: Similarity  
 Selection: All  
 Transform: Square root  
 Resemblance: S17 Bray Curtis similarity

Sums of squares type: Type III (partial)  
 Fixed effects sum to zero for mixed terms  
 Permutation method: Unrestricted permutation of raw data  
 Number of permutations: 9999

### Factors

| Name    | Abbrev. | Type  | Levels |
|---------|---------|-------|--------|
| Species | Sp      | Fixed | 22     |

### PAIR-WISE TESTS

Term 'Sp'

| Groups                                        | t         | P (perm) | Unique perms | P (MC) |
|-----------------------------------------------|-----------|----------|--------------|--------|
| S_abanticus, S_chilo                          | 3,4269    | 0,0173   | 56           | 0,0162 |
| S_abanticus, S_coruhensis (Sakarya)           | 7,1462    | 0,017    | 56           | 0,0003 |
| S_abanticus, S_coruhensis (Yeşilırmak)        | 1,4532    | 0,2892   | 35           | 0,2046 |
| S_abanticus, S_coruhensis (Çoruh)             | 0,88334   | 0,3858   | 2826         | 0,3859 |
| S_abanticus, S_coruhensis (Eastern Black Sea) | 1,956     | 0,1031   | 56           | 0,0994 |
| S_abanticus, S_coruhensis (Marmara)           | 2,7508    | 0,0992   | 10           | 0,0502 |
| S_abanticus, S_euphrata                       | 7,7894E-2 | 0,9812   | 220          | 0,9404 |
| S_abanticus, S_fahrettini                     | 3,9593    | 0,0992   | 10           | 0,0168 |
| S_abanticus, S_kottelati                      | 0,96145   | 0,4285   | 35           | 0,3845 |
| S_abanticus, S_labecula                       | 7,9901E-2 | 0,9287   | 815          | 0,9385 |
| S_abanticus, S_munzuricus                     | 1,0286    | 0,3381   | 220          | 0,3268 |
| S_abanticus, S_okumusi                        | 3,7365    | 0,009    | 220          | 0,0036 |
| S_abanticus, S_opimus (Antalya)               | 1,0131    | 0,4585   | 56           | 0,3478 |
| S_abanticus, S_opimus (Eastern Mediterranean) | 1,0325    | 0,3706   | 35           | 0,3438 |
| S_abanticus, S_opimus (Ceyhan)                | 2,1073    | 0,0328   | 7669         | 0,0418 |

|                                                          |          |        |      |        |
|----------------------------------------------------------|----------|--------|------|--------|
| S_abanticus, S_platycephalus                             | 0,32587  | 0,9831 | 56   | 0,7499 |
| S_abanticus, S_rizeensis (Çoruh)                         | 5,723E-2 | 1      | 10   | 0,9592 |
| S_abanticus, S_rizeensis (Western Black Sea)             | 5,3312   | 0,0316 | 35   | 0,0041 |
| S_abanticus, S_rizeensis (Yeşilırmak)                    | 1,1881   | 0,3    | 10   | 0,3205 |
| S_abanticus, S_rizeensis (Eastern Black Sea)             | 3,9777   | 0,2477 | 4    | 0,0577 |
| S_abanticus, S_tigridis                                  | 0,96741  | 0,3417 | 84   | 0,37   |
| S_chilo, S_coruhensis (Sakarya)                          | 8,2547   | 0,0096 | 126  | 0,0001 |
| S_chilo, S_coruhensis (Yeşilırmak)                       | 0,32405  | 0,7611 | 126  | 0,7508 |
| S_chilo, S_coruhensis (Çoruh)                            | 4,2797   | 0,0003 | 9474 | 0,0004 |
| S_chilo, S_coruhensis (Eastern Black Sea)                | 5,4947   | 0,0091 | 126  | 0,0006 |
| S_chilo, S_coruhensis (Marmara)                          | 4,7427   | 0,0183 | 56   | 0,0035 |
| S_chilo, S_euphrata                                      | 2,3312   | 0,043  | 1977 | 0,0409 |
| S_chilo, S_fahrettini                                    | 2,0639   | 0,0714 | 56   | 0,0836 |
| S_chilo, S_kottelati                                     | 2,1632   | 0,0752 | 126  | 0,0667 |
| S_chilo, S_labecula                                      | 4,4413   | 0,0003 | 7306 | 0,0007 |
| S_chilo, S_munzuricus                                    | 0,66335  | 0,5211 | 1981 | 0,518  |
| S_chilo, S_okumusi                                       | 3,2202   | 0,0091 | 1973 | 0,0058 |
| S_chilo, S_opimus (Antalya)                              | 0,65655  | 0,4796 | 126  | 0,5313 |
| S_chilo, S_opimus (Eastern Mediterranean)                | 0,87338  | 0,427  | 126  | 0,4111 |
| S_chilo, S_opimus (Ceyhan)                               | 1,7391   | 0,0909 | 9881 | 0,0875 |
| S_chilo, S_platycephalus                                 | 1,111    | 0,3102 | 126  | 0,3019 |
| S_chilo, S_rizeensis (Çoruh)                             | 2,5683   | 0,0396 | 56   | 0,0405 |
| S_chilo, S_rizeensis (Western Black Sea)                 | 8,1408   | 0,0072 | 126  | 0,0002 |
| S_chilo, S_rizeensis (Yeşilırmak)                        | 0,2449   | 0,8521 | 21   | 0,8245 |
| S_chilo, S_rizeensis (Eastern Black Sea)                 | 3,7091   | 0,1652 | 6    | 0,0213 |
| S_chilo, S_tigridis                                      | 4,5579   | 0,0048 | 462  | 0,0019 |
| S_coruhensis (Sakarya), S_coruhensis (Yeşilırmak)        | 3,2383   | 0,0081 | 125  | 0,0147 |
| S_coruhensis (Sakarya), S_coruhensis (Çoruh)             | 1,4682   | 0,1526 | 9490 | 0,1562 |
| S_coruhensis (Sakarya), S_coruhensis (Eastern Black Sea) | 2,0875   | 0,0824 | 126  | 0,0697 |
| S_coruhensis (Sakarya), S_coruhensis (Marmara)           | 5,7451   | 0,0174 | 56   | 0,001  |
| S_coruhensis (Sakarya), S_euphrata                       | 2,1274   | 0,0169 | 1986 | 0,0522 |
| S_coruhensis (Sakarya), S_fahrettini                     | 7,7056   | 0,0192 | 56   | 0,0004 |
| S_coruhensis (Sakarya), S_kottelati                      | 4,7663   | 0,0071 | 126  | 0,0019 |
| S_coruhensis (Sakarya), S_labecula                       | 3,8182   | 0,0009 | 7286 | 0,0018 |
| S_coruhensis (Sakarya), S_munzuricus                     | 2,9549   | 0,01   | 1978 | 0,015  |
| S_coruhensis (Sakarya), S_okumusi                        | 6,1465   | 0,0004 | 1988 | 0,0003 |
| S_coruhensis (Sakarya), S_opimus (Antalya)               | 1,8995   | 0,0094 | 123  | 0,0972 |
| S_coruhensis (Sakarya), S_opimus (Eastern Mediterranean) | 3,2826   | 0,0085 | 126  | 0,0143 |
| S_coruhensis (Sakarya), S_opimus (Ceyhan)                | 3,4959   | 0,0009 | 9882 | 0,001  |
| S_coruhensis (Sakarya), S_platycephalus                  | 1,6883   | 0,0317 | 126  | 0,1365 |
| S_coruhensis (Sakarya), S_rizeensis (Çoruh)              | 2,6337   | 0,0366 | 56   | 0,0354 |

|                                                             |          |        |      |        |
|-------------------------------------------------------------|----------|--------|------|--------|
| S_coruhensis (Sakarya), S_rizeensis (Western Black Sea)     | 3,5988   | 0,0076 | 126  | 0,0073 |
| S_coruhensis (Sakarya), S_rizeensis (Yeşilırmak)            | 3,2383   | 0,0484 | 21   | 0,0209 |
| S_coruhensis (Sakarya), S_rizeensis (Eastern Black Sea)     | 0,87415  | 0,498  | 6    | 0,4363 |
| S_coruhensis (Sakarya), S_tigridis                          | 2,4556   | 0,0323 | 462  | 0,0352 |
| S_coruhensis (Yeşilırmak), S_coruhensis (Çoruh)             | 3,6638   | 0,0039 | 7778 | 0,0006 |
| S_coruhensis (Yeşilırmak), S_coruhensis (Eastern Black Sea) | 2,5816   | 0,0151 | 126  | 0,0358 |
| S_coruhensis (Yeşilırmak), S_coruhensis (Marmara)           | 1,8654   | 0,1778 | 35   | 0,121  |
| S_coruhensis (Yeşilırmak), S_euphrata                       | 1,9023   | 0,0212 | 694  | 0,088  |
| S_coruhensis (Yeşilırmak), S_fahrettini                     | 0,76898  | 0,4602 | 35   | 0,4828 |
| S_coruhensis (Yeşilırmak), S_kottelati                      | 1,2265   | 0,3135 | 35   | 0,2601 |
| S_coruhensis (Yeşilırmak), S_labecula                       | 3,0817   | 0,0158 | 3560 | 0,0061 |
| S_coruhensis (Yeşilırmak), S_munzuricus                     | 0,77776  | 0,4522 | 715  | 0,4534 |
| S_coruhensis (Yeşilırmak), S_okumusi                        | 2,2435   | 0,0472 | 715  | 0,0466 |
| S_coruhensis (Yeşilırmak), S_opimus (Antalya)               | 0,42349  | 0,642  | 126  | 0,6779 |
| S_coruhensis (Yeşilırmak), S_opimus (Eastern Mediterranean) | 0,74256  | 0,5107 | 35   | 0,4892 |
| S_coruhensis (Yeşilırmak), S_opimus (Ceyhan)                | 1,3523   | 0,1873 | 9701 | 0,1866 |
| S_coruhensis (Yeşilırmak), S_platycephalus                  | 1,0017   | 0,2721 | 126  | 0,3532 |
| S_coruhensis (Yeşilırmak), S_rizeensis (Çoruh)              | 1,3853   | 0,2562 | 35   | 0,215  |
| S_coruhensis (Yeşilırmak), S_rizeensis (Western Black Sea)  | 3,7547   | 0,0293 | 35   | 0,0098 |
| S_coruhensis (Yeşilırmak), S_rizeensis (Yeşilırmak)         | 0,29844  | 0,5341 | 15   | 0,7886 |
| S_coruhensis (Yeşilırmak), S_rizeensis (Eastern Black Sea)  | 1,353    | 0,4058 | 5    | 0,2609 |
| S_coruhensis (Yeşilırmak), S_tigridis                       | 2,4716   | 0,03   | 210  | 0,0395 |
| S_coruhensis (Çoruh), S_coruhensis (Eastern Black Sea)      | 0,31235  | 0,768  | 9506 | 0,756  |
| S_coruhensis (Çoruh), S_coruhensis (Marmara)                | 4,439E-2 | 0,9718 | 2813 | 0,9718 |
| S_coruhensis (Çoruh), S_euphrata                            | 1,3587   | 0,1845 | 9864 | 0,1871 |
| S_coruhensis (Çoruh), S_fahrettini                          | 5,4369   | 0,0009 | 2841 | 0,0002 |
| S_coruhensis (Çoruh), S_kottelati                           | 1,8435   | 0,0741 | 7823 | 0,0742 |
| S_coruhensis (Çoruh), S_labecula                            | 1,6789   | 0,1003 | 9863 | 0,1011 |
| S_coruhensis (Çoruh), S_munzuricus                          | 3,2549   | 0,0027 | 9892 | 0,0026 |
| S_coruhensis (Çoruh), S_okumusi                             | 9,6657   | 0,0001 | 9903 | 0,0001 |
| S_coruhensis (Çoruh), S_opimus (Antalya)                    | 3,3579   | 0,0126 | 9525 | 0,0022 |
| S_coruhensis (Çoruh), S_opimus (Eastern Mediterranean)      | 2,4488   | 0,0185 | 7853 | 0,0203 |
| S_coruhensis (Çoruh), S_opimus (Ceyhan)                     | 6,5948   | 0,0001 | 9893 | 0,0001 |
| S_coruhensis (Çoruh), S_platycephalus                       | 1,5329   | 0,1222 | 9506 | 0,1384 |
| S_coruhensis (Çoruh), S_rizeensis (Çoruh)                   | 0,79674  | 0,4388 | 2817 | 0,4325 |
| S_coruhensis (Çoruh), S_rizeensis (Western Black Sea)       | 3,4916   | 0,0014 | 7847 | 0,0016 |
| S_coruhensis (Çoruh), S_rizeensis (Yeşilırmak)              | 2,3064   | 0,0309 | 325  | 0,0305 |
| S_coruhensis (Çoruh), S_rizeensis (Eastern Black Sea)       | 0,8267   | 0,3978 | 25   | 0,425  |
| S_coruhensis (Çoruh), S_tigridis                            | 0,25691  | 0,8006 | 9795 | 0,8016 |
| S_coruhensis (Eastern Black Sea), S_coruhensis (Marmara)    | 0,50393  | 0,6618 | 56   | 0,6303 |
| S_coruhensis (Eastern Black Sea), S_euphrata                | 1,1859   | 0,2774 | 1977 | 0,2626 |

|                                                                    |         |        |      |        |
|--------------------------------------------------------------------|---------|--------|------|--------|
| S_coruhensis (Eastern Black Sea), S_fahrettini                     | 5,8528  | 0,0179 | 56   | 0,0008 |
| S_coruhensis (Eastern Black Sea), S_kottelati                      | 2,6153  | 0,0349 | 126  | 0,0366 |
| S_coruhensis (Eastern Black Sea), S_labecula                       | 1,9424  | 0,069  | 7235 | 0,0654 |
| S_coruhensis (Eastern Black Sea), S_munzuricus                     | 2,1957  | 0,0507 | 1987 | 0,0476 |
| S_coruhensis (Eastern Black Sea), S_okumusi                        | 5,5161  | 0,0008 | 1979 | 0,0003 |
| S_coruhensis (Eastern Black Sea), S_opimus (Antalya)               | 1,6485  | 0,1881 | 126  | 0,141  |
| S_coruhensis (Eastern Black Sea), S_opimus (Eastern Mediterranean) | 2,2752  | 0,0438 | 126  | 0,056  |
| S_coruhensis (Eastern Black Sea), S_opimus (Ceyhan)                | 3,1521  | 0,0029 | 9885 | 0,0036 |
| S_coruhensis (Eastern Black Sea), S_platycephalus                  | 1,1041  | 0,3435 | 126  | 0,3005 |
| S_coruhensis (Eastern Black Sea), S_rizeensis (Çoruh)              | 1,1943  | 0,3157 | 56   | 0,2771 |
| S_coruhensis (Eastern Black Sea), S_rizeensis (Western Black Sea)  | 4,1138  | 0,0078 | 126  | 0,0042 |
| S_coruhensis (Eastern Black Sea), S_rizeensis (Yeşilırmak)         | 2,2938  | 0,1025 | 21   | 0,068  |
| S_coruhensis (Eastern Black Sea), S_rizeensis (Eastern Black Sea)  | 1,2045  | 0,662  | 6    | 0,3006 |
| S_coruhensis (Eastern Black Sea), S_tigridis                       | 0,68007 | 0,5074 | 461  | 0,516  |
| S_coruhensis (Marmara), S_euphrata                                 | 0,73213 | 0,3898 | 220  | 0,4905 |
| S_coruhensis (Marmara), S_fahrettini                               | 4,7667  | 0,1035 | 10   | 0,0098 |
| S_coruhensis (Marmara), S_kottelati                                | 2,1249  | 0,0835 | 35   | 0,0885 |
| S_coruhensis (Marmara), S_labecula                                 | 1,2125  | 0,2451 | 816  | 0,2405 |
| S_coruhensis (Marmara), S_munzuricus                               | 1,5541  | 0,1357 | 220  | 0,1567 |
| S_coruhensis (Marmara), S_okumusi                                  | 4,1511  | 0,0093 | 220  | 0,0025 |
| S_coruhensis (Marmara), S_opimus (Antalya)                         | 1,1884  | 0,3537 | 56   | 0,2835 |
| S_coruhensis (Marmara), S_opimus (Eastern Mediterranean)           | 1,6448  | 0,2223 | 35   | 0,1614 |
| S_coruhensis (Marmara), S_opimus (Ceyhan)                          | 2,3615  | 0,0184 | 7657 | 0,0219 |
| S_coruhensis (Marmara), S_platycephalus                            | 0,72595 | 0,6701 | 56   | 0,4915 |
| S_coruhensis (Marmara), S_rizeensis (Çoruh)                        | 0,80582 | 0,7016 | 10   | 0,4642 |
| S_coruhensis (Marmara), S_rizeensis (Western Black Sea)            | 4,3939  | 0,059  | 35   | 0,0077 |
| S_coruhensis (Marmara), S_rizeensis (Yeşilırmak)                   | 1,6852  | 0,0979 | 10   | 0,1884 |
| S_coruhensis (Marmara), S_rizeensis (Eastern Black Sea)            | 6,6642  | 0,2479 | 4    | 0,022  |
| S_coruhensis (Marmara), S_tigridis                                 | 0,23058 | 0,8586 | 84   | 0,8213 |
| S_euphrata, S_fahrettini                                           | 3,3518  | 0,0144 | 219  | 0,0078 |
| S_euphrata, S_kottelati                                            | 0,57437 | 0,6908 | 709  | 0,5748 |
| S_euphrata, S_labecula                                             | 0,21773 | 0,8648 | 9896 | 0,8266 |
| S_euphrata, S_munzuricus                                           | 1,3735  | 0,1887 | 8059 | 0,1885 |
| S_euphrata, S_okumusi                                              | 5,6369  | 0,0004 | 8071 | 0,0001 |
| S_euphrata, S_opimus (Antalya)                                     | 1,7219  | 0,1014 | 1971 | 0,1132 |
| S_euphrata, S_opimus (Eastern Mediterranean)                       | 1,045   | 0,397  | 708  | 0,3171 |
| S_euphrata, S_opimus (Ceyhan)                                      | 3,565   | 0,0009 | 9907 | 0,0006 |
| S_euphrata, S_platycephalus                                        | 0,39764 | 0,793  | 1978 | 0,7031 |
| S_euphrata, S_rizeensis (Çoruh)                                    | 0,10473 | 0,9523 | 220  | 0,9255 |
| S_euphrata, S_rizeensis (Western Black Sea)                        | 3,485   | 0,0012 | 708  | 0,0058 |
| S_euphrata, S_rizeensis (Yeşilırmak)                               | 1,1443  | 0,225  | 55   | 0,2849 |

|                                                |           |        |      |        |
|------------------------------------------------|-----------|--------|------|--------|
| S_euphrata, S_rizeensis (Eastern Black Sea)    | 1,0547    | 0,1991 | 9    | 0,3196 |
| S_euphrata, S_tigridis                         | 0,80748   | 0,5602 | 4290 | 0,4349 |
| S_fahrettini, S_kottelati                      | 3,2793    | 0,0556 | 35   | 0,0215 |
| S_fahrettini, S_labecula                       | 6,1071    | 0,0011 | 816  | 0,0001 |
| S_fahrettini, S_munzuricus                     | 1,8263    | 0,0908 | 220  | 0,095  |
| S_fahrettini, S_okumusi                        | 1,3593    | 0,2083 | 220  | 0,2024 |
| S_fahrettini, S_opimus (Antalya)               | 0,12646   | 0,9274 | 56   | 0,9128 |
| S_fahrettini, S_opimus (Eastern Mediterranean) | 1,9493    | 0,1432 | 35   | 0,1118 |
| S_fahrettini, S_opimus (Ceyhan)                | 0,65517   | 0,5248 | 7702 | 0,5238 |
| S_fahrettini, S_platycephalus                  | 1,8237    | 0,1491 | 56   | 0,1128 |
| S_fahrettini, S_rizeensis (Çoruh)              | 3,1777    | 0,0992 | 10   | 0,0349 |
| S_fahrettini, S_rizeensis (Western Black Sea)  | 7,2169    | 0,0264 | 35   | 0,0011 |
| S_fahrettini, S_rizeensis (Yeşilırmak)         | 1,1429    | 0,4003 | 10   | 0,3347 |
| S_fahrettini, S_rizeensis (Eastern Black Sea)  | 3,0004    | 0,2547 | 4    | 0,0945 |
| S_fahrettini, S_tigridis                       | 5,3258    | 0,0132 | 84   | 0,0012 |
| S_kottelati, S_labecula                        | 1,2635    | 0,223  | 3585 | 0,2197 |
| S_kottelati, S_munzuricus                      | 0,63371   | 0,5516 | 714  | 0,5443 |
| S_kottelati, S_okumusi                         | 3,8407    | 0,0065 | 715  | 0,0021 |
| S_kottelati, S_opimus (Antalya)                | 0,99976   | 0,4476 | 126  | 0,3461 |
| S_kottelati, S_opimus (Eastern Mediterranean)  | 0,53355   | 0,6257 | 35   | 0,6185 |
| S_kottelati, S_opimus (Ceyhan)                 | 2,1684    | 0,034  | 9693 | 0,034  |
| S_kottelati, S_platycephalus                   | 7,1987E-2 | 0,9827 | 126  | 0,9493 |
| S_kottelati, S_rizeensis (Çoruh)               | 0,73039   | 0,4516 | 35   | 0,4993 |
| S_kottelati, S_rizeensis (Western Black Sea)   | 5,4274    | 0,0319 | 35   | 0,0013 |
| S_kottelati, S_rizeensis (Yeşilırmak)          | 0,80372   | 0,598  | 15   | 0,4732 |
| S_kottelati, S_rizeensis (Eastern Black Sea)   | 2,1533    | 0,1933 | 5    | 0,1254 |
| S_kottelati, S_tigridis                        | 1,8746    | 0,1028 | 210  | 0,0965 |
| S_labecula, S_munzuricus                       | 2,197     | 0,034  | 9841 | 0,0392 |
| S_labecula, S_okumusi                          | 8,1472    | 0,0001 | 9851 | 0,0001 |
| S_labecula, S_opimus (Antalya)                 | 2,4289    | 0,0456 | 7379 | 0,029  |
| S_labecula, S_opimus (Eastern Mediterranean)   | 1,9138    | 0,0658 | 3566 | 0,0704 |
| S_labecula, S_opimus (Ceyhan)                  | 4,738     | 0,0001 | 9891 | 0,0001 |
| S_labecula, S_platycephalus                    | 0,74085   | 0,4833 | 7355 | 0,4647 |
| S_labecula, S_rizeensis (Çoruh)                | 1,3249E-2 | 0,9969 | 815  | 0,9951 |
| S_labecula, S_rizeensis (Western Black Sea)    | 6,1811    | 0,0001 | 3551 | 0,0001 |
| S_labecula, S_rizeensis (Yeşilırmak)           | 2,1261    | 0,0745 | 136  | 0,048  |
| S_labecula, S_rizeensis (Eastern Black Sea)    | 1,9606    | 0,0625 | 16   | 0,0677 |
| S_labecula, S_tigridis                         | 1,1792    | 0,2521 | 8969 | 0,2502 |
| S_munzuricus, S_okumusi                        | 4,1414    | 0,0007 | 8155 | 0,0006 |
| S_munzuricus, S_opimus (Antalya)               | 1,1147    | 0,2985 | 1987 | 0,2905 |
| S_munzuricus, S_opimus (Eastern Mediterranean) | 0,12571   | 0,8973 | 714  | 0,907  |

|                                                                   |         |        |      |        |
|-------------------------------------------------------------------|---------|--------|------|--------|
| S_munzuricus, S_opimus (Ceyhan)                                   | 2,7275  | 0,0086 | 9919 | 0,0088 |
| S_munzuricus, S_platycephalus                                     | 0,59034 | 0,5553 | 1983 | 0,5714 |
| S_munzuricus, S_rizeensis (Çoruh)                                 | 1,0171  | 0,3281 | 220  | 0,3367 |
| S_munzuricus, S_rizeensis (Western Black Sea)                     | 3,8979  | 0,0033 | 714  | 0,003  |
| S_munzuricus, S_rizeensis (Yeşilırmak)                            | 0,22084 | 0,8548 | 55   | 0,8349 |
| S_munzuricus, S_rizeensis (Eastern Black Sea)                     | 1,3838  | 0,2029 | 10   | 0,1946 |
| S_munzuricus, S_tigridis                                          | 1,9927  | 0,0685 | 4306 | 0,0728 |
| S_okumusi, S_opimus (Antalya)                                     | 0,97805 | 0,3396 | 1980 | 0,3433 |
| S_okumusi, S_opimus (Eastern Mediterranean)                       | 3,2559  | 0,0115 | 714  | 0,0069 |
| S_okumusi, S_opimus (Ceyhan)                                      | 0,42029 | 0,6794 | 9890 | 0,6885 |
| S_okumusi, S_platycephalus                                        | 3,6295  | 0,0062 | 1988 | 0,0036 |
| S_okumusi, S_rizeensis (Çoruh)                                    | 3,6634  | 0,0091 | 220  | 0,0045 |
| S_okumusi, S_rizeensis (Western Black Sea)                        | 6,4203  | 0,0012 | 715  | 0,0001 |
| S_okumusi, S_rizeensis (Yeşilırmak)                               | 2,0719  | 0,0952 | 55   | 0,0668 |
| S_okumusi, S_rizeensis (Eastern Black Sea)                        | 2,7408  | 0,0995 | 10   | 0,0262 |
| S_okumusi, S_tigridis                                             | 5,6869  | 0,0005 | 4292 | 0,0001 |
| S_opimus (Antalya), S_opimus (Eastern Mediterranean)              | 0,80764 | 0,4401 | 126  | 0,439  |
| S_opimus (Antalya), S_opimus (Ceyhan)                             | 0,77166 | 0,4477 | 9878 | 0,4515 |
| S_opimus (Antalya), S_platycephalus                               | 1,0609  | 0,334  | 126  | 0,3206 |
| S_opimus (Antalya), S_rizeensis (Çoruh)                           | 1,0131  | 0,3927 | 56   | 0,3548 |
| S_opimus (Antalya), S_rizeensis (Western Black Sea)               | 2,1324  | 0,0495 | 126  | 0,069  |
| S_opimus (Antalya), S_rizeensis (Yeşilırmak)                      | 0,44436 | 0,9038 | 21   | 0,6759 |
| S_opimus (Antalya), S_rizeensis (Eastern Black Sea)               | 0,80923 | 0,5    | 6    | 0,4598 |
| S_opimus (Antalya), S_tigridis                                    | 1,6851  | 0,156  | 462  | 0,1268 |
| S_opimus (Eastern Mediterranean), S_opimus (Ceyhan)               | 1,9099  | 0,0641 | 9702 | 0,0611 |
| S_opimus (Eastern Mediterranean), S_platycephalus                 | 0,38496 | 0,7355 | 126  | 0,7072 |
| S_opimus (Eastern Mediterranean), S_rizeensis (Çoruh)             | 0,93825 | 0,3783 | 35   | 0,3897 |
| S_opimus (Eastern Mediterranean), S_rizeensis (Western Black Sea) | 4,0764  | 0,0289 | 35   | 0,0062 |
| S_opimus (Eastern Mediterranean), S_rizeensis (Yeşilırmak)        | 0,29466 | 0,6    | 15   | 0,7828 |
| S_opimus (Eastern Mediterranean), S_rizeensis (Eastern Black Sea) | 1,4145  | 0,4121 | 5    | 0,2482 |
| S_opimus (Eastern Mediterranean), S_tigridis                      | 1,9506  | 0,0856 | 210  | 0,0837 |
| S_opimus (Ceyhan), S_platycephalus                                | 2,4124  | 0,0172 | 9883 | 0,0182 |
| S_opimus (Ceyhan), S_rizeensis (Çoruh)                            | 2,1187  | 0,0341 | 7684 | 0,0411 |
| S_opimus (Ceyhan), S_rizeensis (Western Black Sea)                | 3,7946  | 0,0003 | 9689 | 0,0002 |
| S_opimus (Ceyhan), S_rizeensis (Yeşilırmak)                       | 1,1855  | 0,2616 | 1124 | 0,244  |
| S_opimus (Ceyhan), S_rizeensis (Eastern Black Sea)                | 1,6119  | 0,0881 | 47   | 0,1112 |
| S_opimus (Ceyhan), S_tigridis                                     | 3,2683  | 0,0017 | 9909 | 0,002  |
| S_platycephalus, S_rizeensis (Çoruh)                              | 0,33244 | 0,8863 | 56   | 0,7523 |
| S_platycephalus, S_rizeensis (Western Black Sea)                  | 2,4801  | 0,0166 | 126  | 0,0419 |
| S_platycephalus, S_rizeensis (Yeşilırmak)                         | 0,50364 | 0,8591 | 21   | 0,6346 |
| S_platycephalus, S_rizeensis (Eastern Black Sea)                  | 0,76802 | 0,3354 | 6    | 0,4931 |

|                                                                  |         |        |     |        |
|------------------------------------------------------------------|---------|--------|-----|--------|
| S_platycephalus, S_tigridis                                      | 0,9035  | 0,5158 | 462 | 0,3918 |
| S_rizeensis (Çoruh), S_rizeensis (Western Black Sea)             | 3,6154  | 0,028  | 35  | 0,0123 |
| S_rizeensis (Çoruh), S_rizeensis (Yeşilırmak)                    | 1,0133  | 0,4904 | 10  | 0,3911 |
| S_rizeensis (Çoruh), S_rizeensis (Eastern Black Sea)             | 1,1439  | 0,5    | 4   | 0,3687 |
| S_rizeensis (Çoruh), S_tigridis                                  | 0,67572 | 0,4727 | 84  | 0,5232 |
| S_rizeensis (Western Black Sea), S_rizeensis (Yeşilırmak)        | 3,5704  | 0,0632 | 15  | 0,0228 |
| S_rizeensis (Western Black Sea), S_rizeensis (Eastern Black Sea) | 1,2532  | 0,4027 | 5   | 0,2994 |
| S_rizeensis (Western Black Sea), S_tigridis                      | 4,3493  | 0,0051 | 210 | 0,0028 |
| S_rizeensis (Yeşilırmak), S_rizeensis (Eastern Black Sea)        | 1,0772  | 0,6654 | 3   | 0,4814 |
| S_rizeensis (Yeşilırmak), S_tigridis                             | 2,0128  | 0,1052 | 28  | 0,0886 |
| S_rizeensis (Eastern Black Sea), S_tigridis                      | 1,2933  | 0,4205 | 7   | 0,2524 |

#### Denominators

| Groups                                        | Denominator | Den.df |
|-----------------------------------------------|-------------|--------|
| S_abanticus, S_chilo                          | 1*Res       | 6      |
| S_abanticus, S_coruhensis (Sakarya)           | 1*Res       | 6      |
| S_abanticus, S_coruhensis (Yeşilırmak)        | 1*Res       | 5      |
| S_abanticus, S_coruhensis (Çoruh)             | 1*Res       | 25     |
| S_abanticus, S_coruhensis (Eastern Black Sea) | 1*Res       | 6      |
| S_abanticus, S_coruhensis (Marmara)           | 1*Res       | 4      |
| S_abanticus, S_euphrata                       | 1*Res       | 10     |
| S_abanticus, S_fahrettini                     | 1*Res       | 4      |
| S_abanticus, S_kottelati                      | 1*Res       | 5      |
| S_abanticus, S_labecula                       | 1*Res       | 16     |
| S_abanticus, S_munzuricus                     | 1*Res       | 10     |
| S_abanticus, S_okumusi                        | 1*Res       | 10     |
| S_abanticus, S_opimus (Antalya)               | 1*Res       | 6      |
| S_abanticus, S_opimus (Eastern Mediterranean) | 1*Res       | 5      |
| S_abanticus, S_opimus (Ceyhan)                | 1*Res       | 47     |
| S_abanticus, S_platycephalus                  | 1*Res       | 6      |
| S_abanticus, S_rizeensis (Çoruh)              | 1*Res       | 4      |
| S_abanticus, S_rizeensis (Western Black Sea)  | 1*Res       | 5      |
| S_abanticus, S_rizeensis (Yeşilırmak)         | 1*Res       | 3      |
| S_abanticus, S_rizeensis (Eastern Black Sea)  | 1*Res       | 2      |
| S_abanticus, S_tigridis                       | 1*Res       | 7      |
| S_chilo, S_coruhensis (Sakarya)               | 1*Res       | 8      |
| S_chilo, S_coruhensis (Yeşilırmak)            | 1*Res       | 7      |
| S_chilo, S_coruhensis (Çoruh)                 | 1*Res       | 27     |
| S_chilo, S_coruhensis (Eastern Black Sea)     | 1*Res       | 8      |
| S_chilo, S_coruhensis (Marmara)               | 1*Res       | 6      |
| S_chilo, S_euphrata                           | 1*Res       | 12     |

|                                                             |       |    |
|-------------------------------------------------------------|-------|----|
| S_chilo, S_fahrettini                                       | 1*Res | 6  |
| S_chilo, S_kottelati                                        | 1*Res | 7  |
| S_chilo, S_labecula                                         | 1*Res | 18 |
| S_chilo, S_munzuricus                                       | 1*Res | 12 |
| S_chilo, S_okumusi                                          | 1*Res | 12 |
| S_chilo, S_opimus (Antalya)                                 | 1*Res | 8  |
| S_chilo, S_opimus (Eastern Mediterranean)                   | 1*Res | 7  |
| S_chilo, S_opimus (Ceyhan)                                  | 1*Res | 49 |
| S_chilo, S_platycephalus                                    | 1*Res | 8  |
| S_chilo, S_rizeensis (Çoruh)                                | 1*Res | 6  |
| S_chilo, S_rizeensis (Western Black Sea)                    | 1*Res | 7  |
| S_chilo, S_rizeensis (Yeşilırmak)                           | 1*Res | 5  |
| S_chilo, S_rizeensis (Eastern Black Sea)                    | 1*Res | 4  |
| S_chilo, S_tigridis                                         | 1*Res | 9  |
| S_coruhensis (Sakarya), S_coruhensis (Yeşilırmak)           | 1*Res | 7  |
| S_coruhensis (Sakarya), S_coruhensis (Çoruh)                | 1*Res | 27 |
| S_coruhensis (Sakarya), S_coruhensis (Eastern Black Sea)    | 1*Res | 8  |
| S_coruhensis (Sakarya), S_coruhensis (Marmara)              | 1*Res | 6  |
| S_coruhensis (Sakarya), S_euphrata                          | 1*Res | 12 |
| S_coruhensis (Sakarya), S_fahrettini                        | 1*Res | 6  |
| S_coruhensis (Sakarya), S_kottelati                         | 1*Res | 7  |
| S_coruhensis (Sakarya), S_labecula                          | 1*Res | 18 |
| S_coruhensis (Sakarya), S_munzuricus                        | 1*Res | 12 |
| S_coruhensis (Sakarya), S_okumusi                           | 1*Res | 12 |
| S_coruhensis (Sakarya), S_opimus (Antalya)                  | 1*Res | 8  |
| S_coruhensis (Sakarya), S_opimus (Eastern Mediterranean)    | 1*Res | 7  |
| S_coruhensis (Sakarya), S_opimus (Ceyhan)                   | 1*Res | 49 |
| S_coruhensis (Sakarya), S_platycephalus                     | 1*Res | 8  |
| S_coruhensis (Sakarya), S_rizeensis (Çoruh)                 | 1*Res | 6  |
| S_coruhensis (Sakarya), S_rizeensis (Western Black Sea)     | 1*Res | 7  |
| S_coruhensis (Sakarya), S_rizeensis (Yeşilırmak)            | 1*Res | 5  |
| S_coruhensis (Sakarya), S_rizeensis (Eastern Black Sea)     | 1*Res | 4  |
| S_coruhensis (Sakarya), S_tigridis                          | 1*Res | 9  |
| S_coruhensis (Yeşilırmak), S_coruhensis (Çoruh)             | 1*Res | 26 |
| S_coruhensis (Yeşilırmak), S_coruhensis (Eastern Black Sea) | 1*Res | 7  |
| S_coruhensis (Yeşilırmak), S_coruhensis (Marmara)           | 1*Res | 5  |
| S_coruhensis (Yeşilırmak), S_euphrata                       | 1*Res | 11 |
| S_coruhensis (Yeşilırmak), S_fahrettini                     | 1*Res | 5  |
| S_coruhensis (Yeşilırmak), S_kottelati                      | 1*Res | 6  |
| S_coruhensis (Yeşilırmak), S_labecula                       | 1*Res | 17 |
| S_coruhensis (Yeşilırmak), S_munzuricus                     | 1*Res | 11 |

|                                                                    |       |    |
|--------------------------------------------------------------------|-------|----|
| S_coruhensis (Yeşilırmak), S_okumusi                               | 1*Res | 11 |
| S_coruhensis (Yeşilırmak), S_opimus (Antalya)                      | 1*Res | 7  |
| S_coruhensis (Yeşilırmak), S_opimus (Eastern Mediterranean)        | 1*Res | 6  |
| S_coruhensis (Yeşilırmak), S_opimus (Ceyhan)                       | 1*Res | 48 |
| S_coruhensis (Yeşilırmak), S_platycephalus                         | 1*Res | 7  |
| S_coruhensis (Yeşilırmak), S_rizeensis (Çoruh)                     | 1*Res | 5  |
| S_coruhensis (Yeşilırmak), S_rizeensis (Western Black Sea)         | 1*Res | 6  |
| S_coruhensis (Yeşilırmak), S_rizeensis (Yeşilırmak)                | 1*Res | 4  |
| S_coruhensis (Yeşilırmak), S_rizeensis (Eastern Black Sea)         | 1*Res | 3  |
| S_coruhensis (Yeşilırmak), S_tigridis                              | 1*Res | 8  |
| S_coruhensis (Çoruh), S_coruhensis (Eastern Black Sea)             | 1*Res | 27 |
| S_coruhensis (Çoruh), S_coruhensis (Marmara)                       | 1*Res | 25 |
| S_coruhensis (Çoruh), S_euphrata                                   | 1*Res | 31 |
| S_coruhensis (Çoruh), S_fahrettini                                 | 1*Res | 25 |
| S_coruhensis (Çoruh), S_kottelati                                  | 1*Res | 26 |
| S_coruhensis (Çoruh), S_labecula                                   | 1*Res | 37 |
| S_coruhensis (Çoruh), S_munzuricus                                 | 1*Res | 31 |
| S_coruhensis (Çoruh), S_okumusi                                    | 1*Res | 31 |
| S_coruhensis (Çoruh), S_opimus (Antalya)                           | 1*Res | 27 |
| S_coruhensis (Çoruh), S_opimus (Eastern Mediterranean)             | 1*Res | 26 |
| S_coruhensis (Çoruh), S_opimus (Ceyhan)                            | 1*Res | 68 |
| S_coruhensis (Çoruh), S_platycephalus                              | 1*Res | 27 |
| S_coruhensis (Çoruh), S_rizeensis (Çoruh)                          | 1*Res | 25 |
| S_coruhensis (Çoruh), S_rizeensis (Western Black Sea)              | 1*Res | 26 |
| S_coruhensis (Çoruh), S_rizeensis (Yeşilırmak)                     | 1*Res | 24 |
| S_coruhensis (Çoruh), S_rizeensis (Eastern Black Sea)              | 1*Res | 23 |
| S_coruhensis (Çoruh), S_tigridis                                   | 1*Res | 28 |
| S_coruhensis (Eastern Black Sea), S_coruhensis (Marmara)           | 1*Res | 6  |
| S_coruhensis (Eastern Black Sea), S_euphrata                       | 1*Res | 12 |
| S_coruhensis (Eastern Black Sea), S_fahrettini                     | 1*Res | 6  |
| S_coruhensis (Eastern Black Sea), S_kottelati                      | 1*Res | 7  |
| S_coruhensis (Eastern Black Sea), S_labecula                       | 1*Res | 18 |
| S_coruhensis (Eastern Black Sea), S_munzuricus                     | 1*Res | 12 |
| S_coruhensis (Eastern Black Sea), S_okumusi                        | 1*Res | 12 |
| S_coruhensis (Eastern Black Sea), S_opimus (Antalya)               | 1*Res | 8  |
| S_coruhensis (Eastern Black Sea), S_opimus (Eastern Mediterranean) | 1*Res | 7  |
| S_coruhensis (Eastern Black Sea), S_opimus (Ceyhan)                | 1*Res | 49 |
| S_coruhensis (Eastern Black Sea), S_platycephalus                  | 1*Res | 8  |
| S_coruhensis (Eastern Black Sea), S_rizeensis (Çoruh)              | 1*Res | 6  |
| S_coruhensis (Eastern Black Sea), S_rizeensis (Western Black Sea)  | 1*Res | 7  |
| S_coruhensis (Eastern Black Sea), S_rizeensis (Yeşilırmak)         | 1*Res | 5  |

|                                                                   |       |    |
|-------------------------------------------------------------------|-------|----|
| S_coruhensis (Eastern Black Sea), S_rizeensis (Eastern Black Sea) | 1*Res | 4  |
| S_coruhensis (Eastern Black Sea), S_tigridis                      | 1*Res | 9  |
| S_coruhensis (Marmara), S_euphrata                                | 1*Res | 10 |
| S_coruhensis (Marmara), S_fahrettini                              | 1*Res | 4  |
| S_coruhensis (Marmara), S_kottelati                               | 1*Res | 5  |
| S_coruhensis (Marmara), S_labecula                                | 1*Res | 16 |
| S_coruhensis (Marmara), S_munzuricus                              | 1*Res | 10 |
| S_coruhensis (Marmara), S_okumusi                                 | 1*Res | 10 |
| S_coruhensis (Marmara), S_opimus (Antalya)                        | 1*Res | 6  |
| S_coruhensis (Marmara), S_opimus (Eastern Mediterranean)          | 1*Res | 5  |
| S_coruhensis (Marmara), S_opimus (Ceyhan)                         | 1*Res | 47 |
| S_coruhensis (Marmara), S_platycephalus                           | 1*Res | 6  |
| S_coruhensis (Marmara), S_rizeensis (Çoruh)                       | 1*Res | 4  |
| S_coruhensis (Marmara), S_rizeensis (Western Black Sea)           | 1*Res | 5  |
| S_coruhensis (Marmara), S_rizeensis (Yeşilırmak)                  | 1*Res | 3  |
| S_coruhensis (Marmara), S_rizeensis (Eastern Black Sea)           | 1*Res | 2  |
| S_coruhensis (Marmara), S_tigridis                                | 1*Res | 7  |
| S_euphrata, S_fahrettini                                          | 1*Res | 10 |
| S_euphrata, S_kottelati                                           | 1*Res | 11 |
| S_euphrata, S_labecula                                            | 1*Res | 22 |
| S_euphrata, S_munzuricus                                          | 1*Res | 16 |
| S_euphrata, S_okumusi                                             | 1*Res | 16 |
| S_euphrata, S_opimus (Antalya)                                    | 1*Res | 12 |
| S_euphrata, S_opimus (Eastern Mediterranean)                      | 1*Res | 11 |
| S_euphrata, S_opimus (Ceyhan)                                     | 1*Res | 53 |
| S_euphrata, S_platycephalus                                       | 1*Res | 12 |
| S_euphrata, S_rizeensis (Çoruh)                                   | 1*Res | 10 |
| S_euphrata, S_rizeensis (Western Black Sea)                       | 1*Res | 11 |
| S_euphrata, S_rizeensis (Yeşilırmak)                              | 1*Res | 9  |
| S_euphrata, S_rizeensis (Eastern Black Sea)                       | 1*Res | 8  |
| S_euphrata, S_tigridis                                            | 1*Res | 13 |
| S_fahrettini, S_kottelati                                         | 1*Res | 5  |
| S_fahrettini, S_labecula                                          | 1*Res | 16 |
| S_fahrettini, S_munzuricus                                        | 1*Res | 10 |
| S_fahrettini, S_okumusi                                           | 1*Res | 10 |
| S_fahrettini, S_opimus (Antalya)                                  | 1*Res | 6  |
| S_fahrettini, S_opimus (Eastern Mediterranean)                    | 1*Res | 5  |
| S_fahrettini, S_opimus (Ceyhan)                                   | 1*Res | 47 |
| S_fahrettini, S_platycephalus                                     | 1*Res | 6  |
| S_fahrettini, S_rizeensis (Çoruh)                                 | 1*Res | 4  |
| S_fahrettini, S_rizeensis (Western Black Sea)                     | 1*Res | 5  |

|                                                |       |    |
|------------------------------------------------|-------|----|
| S_fahrettini, S_rizeensis (Yeşilırmak)         | 1*Res | 3  |
| S_fahrettini, S_rizeensis (Eastern Black Sea)  | 1*Res | 2  |
| S_fahrettini, S_tigridis                       | 1*Res | 7  |
| S_kottelati, S_labecula                        | 1*Res | 17 |
| S_kottelati, S_munzuricus                      | 1*Res | 11 |
| S_kottelati, S_okumusi                         | 1*Res | 11 |
| S_kottelati, S_opimus (Antalya)                | 1*Res | 7  |
| S_kottelati, S_opimus (Eastern Mediterranean)  | 1*Res | 6  |
| S_kottelati, S_opimus (Ceyhan)                 | 1*Res | 48 |
| S_kottelati, S_platycephalus                   | 1*Res | 7  |
| S_kottelati, S_rizeensis (Çoruh)               | 1*Res | 5  |
| S_kottelati, S_rizeensis (Western Black Sea)   | 1*Res | 6  |
| S_kottelati, S_rizeensis (Yeşilırmak)          | 1*Res | 4  |
| S_kottelati, S_rizeensis (Eastern Black Sea)   | 1*Res | 3  |
| S_kottelati, S_tigridis                        | 1*Res | 8  |
| S_labecula, S_munzuricus                       | 1*Res | 22 |
| S_labecula, S_okumusi                          | 1*Res | 22 |
| S_labecula, S_opimus (Antalya)                 | 1*Res | 18 |
| S_labecula, S_opimus (Eastern Mediterranean)   | 1*Res | 17 |
| S_labecula, S_opimus (Ceyhan)                  | 1*Res | 59 |
| S_labecula, S_platycephalus                    | 1*Res | 18 |
| S_labecula, S_rizeensis (Çoruh)                | 1*Res | 16 |
| S_labecula, S_rizeensis (Western Black Sea)    | 1*Res | 17 |
| S_labecula, S_rizeensis (Yeşilırmak)           | 1*Res | 15 |
| S_labecula, S_rizeensis (Eastern Black Sea)    | 1*Res | 14 |
| S_labecula, S_tigridis                         | 1*Res | 19 |
| S_munzuricus, S_okumusi                        | 1*Res | 16 |
| S_munzuricus, S_opimus (Antalya)               | 1*Res | 12 |
| S_munzuricus, S_opimus (Eastern Mediterranean) | 1*Res | 11 |
| S_munzuricus, S_opimus (Ceyhan)                | 1*Res | 53 |
| S_munzuricus, S_platycephalus                  | 1*Res | 12 |
| S_munzuricus, S_rizeensis (Çoruh)              | 1*Res | 10 |
| S_munzuricus, S_rizeensis (Western Black Sea)  | 1*Res | 11 |
| S_munzuricus, S_rizeensis (Yeşilırmak)         | 1*Res | 9  |
| S_munzuricus, S_rizeensis (Eastern Black Sea)  | 1*Res | 8  |
| S_munzuricus, S_tigridis                       | 1*Res | 13 |
| S_okumusi, S_opimus (Antalya)                  | 1*Res | 12 |
| S_okumusi, S_opimus (Eastern Mediterranean)    | 1*Res | 11 |
| S_okumusi, S_opimus (Ceyhan)                   | 1*Res | 53 |
| S_okumusi, S_platycephalus                     | 1*Res | 12 |
| S_okumusi, S_rizeensis (Çoruh)                 | 1*Res | 10 |

|                                                                   |       |    |
|-------------------------------------------------------------------|-------|----|
| S_okumusi, S_rizeensis (Western Black Sea)                        | 1*Res | 11 |
| S_okumusi, S_rizeensis (Yeşilırmak)                               | 1*Res | 9  |
| S_okumusi, S_rizeensis (Eastern Black Sea)                        | 1*Res | 8  |
| S_okumusi, S_tigridis                                             | 1*Res | 13 |
| S_opimus (Antalya), S_opimus (Eastern Mediterranean)              | 1*Res | 7  |
| S_opimus (Antalya), S_opimus (Ceyhan)                             | 1*Res | 49 |
| S_opimus (Antalya), S_platycephalus                               | 1*Res | 8  |
| S_opimus (Antalya), S_rizeensis (Çoruh)                           | 1*Res | 6  |
| S_opimus (Antalya), S_rizeensis (Western Black Sea)               | 1*Res | 7  |
| S_opimus (Antalya), S_rizeensis (Yeşilırmak)                      | 1*Res | 5  |
| S_opimus (Antalya), S_rizeensis (Eastern Black Sea)               | 1*Res | 4  |
| S_opimus (Antalya), S_tigridis                                    | 1*Res | 9  |
| S_opimus (Eastern Mediterranean), S_opimus (Ceyhan)               | 1*Res | 48 |
| S_opimus (Eastern Mediterranean), S_platycephalus                 | 1*Res | 7  |
| S_opimus (Eastern Mediterranean), S_rizeensis (Çoruh)             | 1*Res | 5  |
| S_opimus (Eastern Mediterranean), S_rizeensis (Western Black Sea) | 1*Res | 6  |
| S_opimus (Eastern Mediterranean), S_rizeensis (Yeşilırmak)        | 1*Res | 4  |
| S_opimus (Eastern Mediterranean), S_rizeensis (Eastern Black Sea) | 1*Res | 3  |
| S_opimus (Eastern Mediterranean), S_tigridis                      | 1*Res | 8  |
| S_opimus (Ceyhan), S_platycephalus                                | 1*Res | 49 |
| S_opimus (Ceyhan), S_rizeensis (Çoruh)                            | 1*Res | 47 |
| S_opimus (Ceyhan), S_rizeensis (Western Black Sea)                | 1*Res | 48 |
| S_opimus (Ceyhan), S_rizeensis (Yeşilırmak)                       | 1*Res | 46 |
| S_opimus (Ceyhan), S_rizeensis (Eastern Black Sea)                | 1*Res | 45 |
| S_opimus (Ceyhan), S_tigridis                                     | 1*Res | 50 |
| S_platycephalus, S_rizeensis (Çoruh)                              | 1*Res | 6  |
| S_platycephalus, S_rizeensis (Western Black Sea)                  | 1*Res | 7  |
| S_platycephalus, S_rizeensis (Yeşilırmak)                         | 1*Res | 5  |
| S_platycephalus, S_rizeensis (Eastern Black Sea)                  | 1*Res | 4  |
| S_platycephalus, S_tigridis                                       | 1*Res | 9  |
| S_rizeensis (Çoruh), S_rizeensis (Western Black Sea)              | 1*Res | 5  |
| S_rizeensis (Çoruh), S_rizeensis (Yeşilırmak)                     | 1*Res | 3  |
| S_rizeensis (Çoruh), S_rizeensis (Eastern Black Sea)              | 1*Res | 2  |
| S_rizeensis (Çoruh), S_tigridis                                   | 1*Res | 7  |
| S_rizeensis (Western Black Sea), S_rizeensis (Yeşilırmak)         | 1*Res | 4  |
| S_rizeensis (Western Black Sea), S_rizeensis (Eastern Black Sea)  | 1*Res | 3  |
| S_rizeensis (Western Black Sea), S_tigridis                       | 1*Res | 8  |
| S_rizeensis (Yeşilırmak), S_rizeensis (Eastern Black Sea)         | 1*Res | 1  |
| S_rizeensis (Yeşilırmak), S_tigridis                              | 1*Res | 6  |
| S_rizeensis (Eastern Black Sea), S_tigridis                       | 1*Res | 5  |

*Average Similarity between/within groups*

|                                  | S_abanticus  | S_chilo   | S_coruhensis | (Sakarya)           | S_coruhensis | (Yeşilırmak) |
|----------------------------------|--------------|-----------|--------------|---------------------|--------------|--------------|
|                                  | S_coruhensis | (Çoruh)   | S_coruhensis | (Eastern Black Sea) |              |              |
|                                  | S_coruhensis | (Marmara) |              |                     | S_euphrata   |              |
| S_abanticus                      | 99,407       |           |              |                     |              |              |
| S_chilo                          | 97,746       | 98,812    |              |                     |              |              |
| S_coruhensis (Sakarya)           | 98,22        | 95,968    |              | 99,653              |              |              |
| S_coruhensis (Yeşilırmak)        | 97,109       | 97,299    |              | 95,499              |              | 96,171       |
| S_coruhensis (Çoruh)             | 98,518       | 96,868    |              | 98,729              |              | 96,163       |
| 98,331                           |              |           |              |                     |              |              |
| S_coruhensis (Eastern Black Sea) | 98,941       | 96,751    |              | 99,103              |              | 96,281       |
| 98,716                           |              |           | 99,021       |                     |              |              |
| S_coruhensis (Marmara)           | 99,245       | 96,992    |              | 98,975              |              | 96,522       |
| 98,774                           |              |           | 99,32        |                     |              | 99,786       |
| S_euphrata                       | 98,902       | 97,197    |              | 98,141              |              | 96,783       |
| 98,215                           |              |           | 98,665       |                     |              | 99,038       |
| 98,437                           |              |           |              |                     |              |              |
| S_fahrettini                     | 95,691       | 97,725    |              | 93,915              |              | 97,101       |
| 94,905                           |              |           | 94,697       |                     |              | 94,937       |
| 95,529                           |              |           |              |                     |              |              |
| S_kottelati                      | 99,098       | 98,239    |              | 97,546              |              | 97,211       |
| 98,066                           |              |           | 98,323       |                     |              | 98,571       |
| 98,417                           |              |           |              |                     |              |              |
| S_labecula                       | 99,167       | 97,685    |              | 98,258              |              | 96,873       |
| 98,42                            |              |           | 98,776       |                     |              | 99,009       |
| 98,629                           |              |           |              |                     |              |              |
| S_munzuricus                     | 97,833       | 97,9      |              | 96,722              |              | 96,905       |
| 97,169                           |              |           | 97,241       |                     |              | 97,423       |
| 97,392                           |              |           |              |                     |              |              |
| S_okumusi                        | 93,083       | 95,316    |              | 91,315              |              | 95,282       |
| 92,309                           |              |           | 92,093       |                     |              | 92,332       |
| 93,087                           |              |           |              |                     |              |              |
| S_opimus (Antalya)               | 94,618       | 94,158    |              | 93,929              |              | 94,066       |
| 94,127                           |              |           | 94,364       |                     |              | 94,68        |
| 94,539                           |              |           |              |                     |              |              |
| S_opimus (Eastern Mediterranean) | 98,151       | 98,058    |              | 96,906              |              | 97,04        |
| 97,403                           |              |           | 97,543       |                     |              | 97,838       |

|                                 |        |        |        |        |        |
|---------------------------------|--------|--------|--------|--------|--------|
| 97,731                          |        |        |        |        |        |
| S_opimus (Ceyhan)               | 93,693 | 94,965 |        | 92,02  | 94,736 |
| 92,861                          |        |        | 92,784 |        | 93,037 |
| 93,507                          |        |        |        |        |        |
| S_platycephalus                 | 98,123 | 96,802 |        | 97,567 | 96,522 |
| 97,595                          |        |        | 97,944 |        | 98,221 |
| 97,896                          |        |        |        |        |        |
| S_rizeensis (Çoruh)             | 98,879 | 97,651 |        | 98,257 | 96,731 |
| 98,333                          |        |        | 98,642 |        | 98,795 |
| 98,419                          |        |        |        |        |        |
| S_rizeensis (Western Black Sea) | 96,479 | 94,23  |        | 98,258 | 93,764 |
| 97,244                          |        |        | 97,474 |        | 97,233 |
| 96,401                          |        |        |        |        |        |
| S_rizeensis (Yeşilırmak)        | 97,797 | 97,877 |        | 96,301 | 97,187 |
| 96,913                          |        |        | 97,075 |        | 97,325 |
| 97,444                          |        |        |        |        |        |
| S_rizeensis (Eastern Black Sea) | 97,957 | 95,705 |        | 99,707 | 95,237 |
| 98,609                          |        |        | 98,951 |        | 98,711 |
| 97,878                          |        |        |        |        |        |
| S_tigridis                      | 98,96  | 97,133 |        | 98,82  | 96,459 |
| 98,598                          |        |        | 98,99  |        | 99,177 |
| 98,578                          |        |        |        |        |        |

|                                  |                                  |             |            |                   |           |          |
|----------------------------------|----------------------------------|-------------|------------|-------------------|-----------|----------|
|                                  | S_fahrettini                     | S_kottelati | S_labecula | S_munzuricus      | S_okumusi | S_opimus |
| (Antalya)                        | S_opimus (Eastern Mediterranean) |             |            | S_opimus (Ceyhan) |           |          |
|                                  | S_platycephalus                  |             |            |                   |           |          |
| S_abanticus                      |                                  |             |            |                   |           |          |
| S_chilo                          |                                  |             |            |                   |           |          |
| S_coruhensis (Sakarya)           |                                  |             |            |                   |           |          |
| S_coruhensis (Yeşilırmak)        |                                  |             |            |                   |           |          |
| S_coruhensis (Çoruh)             |                                  |             |            |                   |           |          |
| S_coruhensis (Eastern Black Sea) |                                  |             |            |                   |           |          |
| S_coruhensis (Marmara)           |                                  |             |            |                   |           |          |
| S_euphrata                       |                                  |             |            |                   |           |          |

|                                                     |        |                                                        |                                 |                           |        |
|-----------------------------------------------------|--------|--------------------------------------------------------|---------------------------------|---------------------------|--------|
| S_fahrettini                                        | 97,571 |                                                        |                                 |                           |        |
| S_kottelati                                         | 96,364 | 98,642                                                 |                                 |                           |        |
| S_labecula                                          | 95,645 | 98,787                                                 | 98,847                          |                           |        |
| S_munzuricus                                        | 96,686 | 97,919                                                 | 97,734                          | 97,156                    |        |
| S_okumusi                                           | 96,742 | 93,754                                                 | 93,037                          | 94,391                    | 96,43  |
| S_opimus (Antalya)<br>91,942                        | 93,742 | 94,48                                                  | 94,494                          | 94,154                    | 93,225 |
| S_opimus (Eastern Mediterranean)<br>94,303          | 96,776 | 98,201                                                 | 97,974<br>97,297                | 97,576                    | 94,394 |
| S_opimus (Ceyhan)<br>93,064                         | 95,508 | 94,115                                                 | 93,581<br>94,295                | 94,281<br>94,235          | 95,148 |
| S_platycephalus<br>94,281<br>96,757                 | 95,57  | 97,748                                                 | 97,915<br>97,214                | 96,975<br>93,573          | 93,344 |
| S_rizeensis (Çoruh)<br>94,388<br>97,756             | 95,643 | 98,582                                                 | 98,729<br>97,856                | 97,654<br>93,524          | 93,036 |
| S_rizeensis (Western Black Sea)<br>92,203<br>95,875 | 92,182 | 95,806                                                 | 96,525<br>95,167                | 94,993<br>90,296          | 89,59  |
| S_rizeensis (Yeşilırmak)<br>94,227<br>97,003        | 97,056 | 97,873                                                 | 97,575<br>97,693                | 97,371<br>94,531          | 94,964 |
| S_rizeensis (Eastern Black Sea)<br>93,668<br>97,351 | 93,653 | 97,283                                                 | 98,003<br>96,643                | 96,468<br>91,759          | 91,053 |
| S_tigridis<br>94,416<br>97,877                      | 95,079 | 98,45                                                  | 98,796<br>97,69                 | 97,468<br>93,087          | 92,473 |
| (Yeşilırmak)<br>S_abanticus                         |        | S_rizeensis (Çoruh)<br>S_rizeensis (Eastern Black Sea) | S_rizeensis (Western Black Sea) | S_rizeensis<br>S_tigridis |        |
| S_chilo                                             |        |                                                        |                                 |                           |        |

|                                  |        |       |        |        |
|----------------------------------|--------|-------|--------|--------|
| S_coruhensis (Sakarya)           |        |       |        |        |
| S_coruhensis (Yeşilırmak)        |        |       |        |        |
| S_coruhensis (Çoruh)             |        |       |        |        |
| S_coruhensis (Eastern Black Sea) |        |       |        |        |
| S_coruhensis (Marmara)           |        |       |        |        |
| S_euphrata                       |        |       |        |        |
| S_fahrettini                     |        |       |        |        |
| S_kottelati                      |        |       |        |        |
| S_labecula                       |        |       |        |        |
| S_munzuricus                     |        |       |        |        |
| S_okumusi                        |        |       |        |        |
| S_opimus (Antalya)               |        |       |        |        |
| S_opimus (Eastern Mediterranean) |        |       |        |        |
| S_opimus (Ceyhan)                |        |       |        |        |
| S_platycephalus                  |        |       |        |        |
| S_rizeensis (Çoruh)              | 97,99  |       |        |        |
| S_rizeensis (Western Black Sea)  | 96,527 |       | 98,688 |        |
| S_rizeensis (Yeşilırmak)         | 97,444 |       | 94,564 |        |
| 95,755                           |        |       |        |        |
| S_rizeensis (Eastern Black Sea)  | 98,005 |       | 98,521 |        |
| 96,039                           |        | 0     |        |        |
| S_tigridis                       | 98,657 |       | 97,092 |        |
| 97,186                           |        | 98,57 |        | 98,783 |
